# Supplementary material
Source: PubMed Central journal article supplement (PMC2631626)
Supplement: NIHMS86708-supplement-1_si_001.pdf [file NIHMS86708-supplement-1_si_001.pdf]

# Supporting Information

## The Balance of Beneficial and Deleterious Health Effects of Quinones: A Case Study of the Chemical Properties of Genistein and Estrone Quinones

*Qiang Zhang, Tingting Tu, D. André d'Avignon and Michael L. Gross\**

Department of Chemistry, Washington University in St. Louis, MO 63130

| <b>Contents</b>                                                                                                                 | <b>Page</b> |
|---------------------------------------------------------------------------------------------------------------------------------|-------------|
| Figures                                                                                                                         |             |
| S1 <sup>1</sup> H NMR spectra of CGenQ and CE <sub>1</sub> Qs                                                                   | S-2         |
| S2 Plots of 2 <sup>nd</sup> -order kinetics of Gen + IBX and E <sub>1</sub> + IBX                                               | S-3         |
| S3 An example of MS/MS product ion spectrum of a CGen-Ade adduct                                                                | S-4         |
| S4 Representative structures of [CGen-Ade + H] <sup>+</sup> adducts and proposed MS/MS fragmentation                            | S-5         |
| S5 Reconstructed ion chromatogram showing the formation of CGen-Ade and CE <sub>1</sub> Q-Ade adducts in DMF.                   | S-6         |
| S6 MS/MS Product ion spectra of the two CE <sub>1</sub> -Ade adducts from the reaction of CE <sub>1</sub> Q and calf thymus DNA | S-7         |
| Tables                                                                                                                          |             |
| S1 Accurate mass measurement of MS/MS product ions of Gen and CGen                                                              | S-8         |
| S2 Accurate mass measurement for CGen-Ade adducts                                                                               | S-9         |

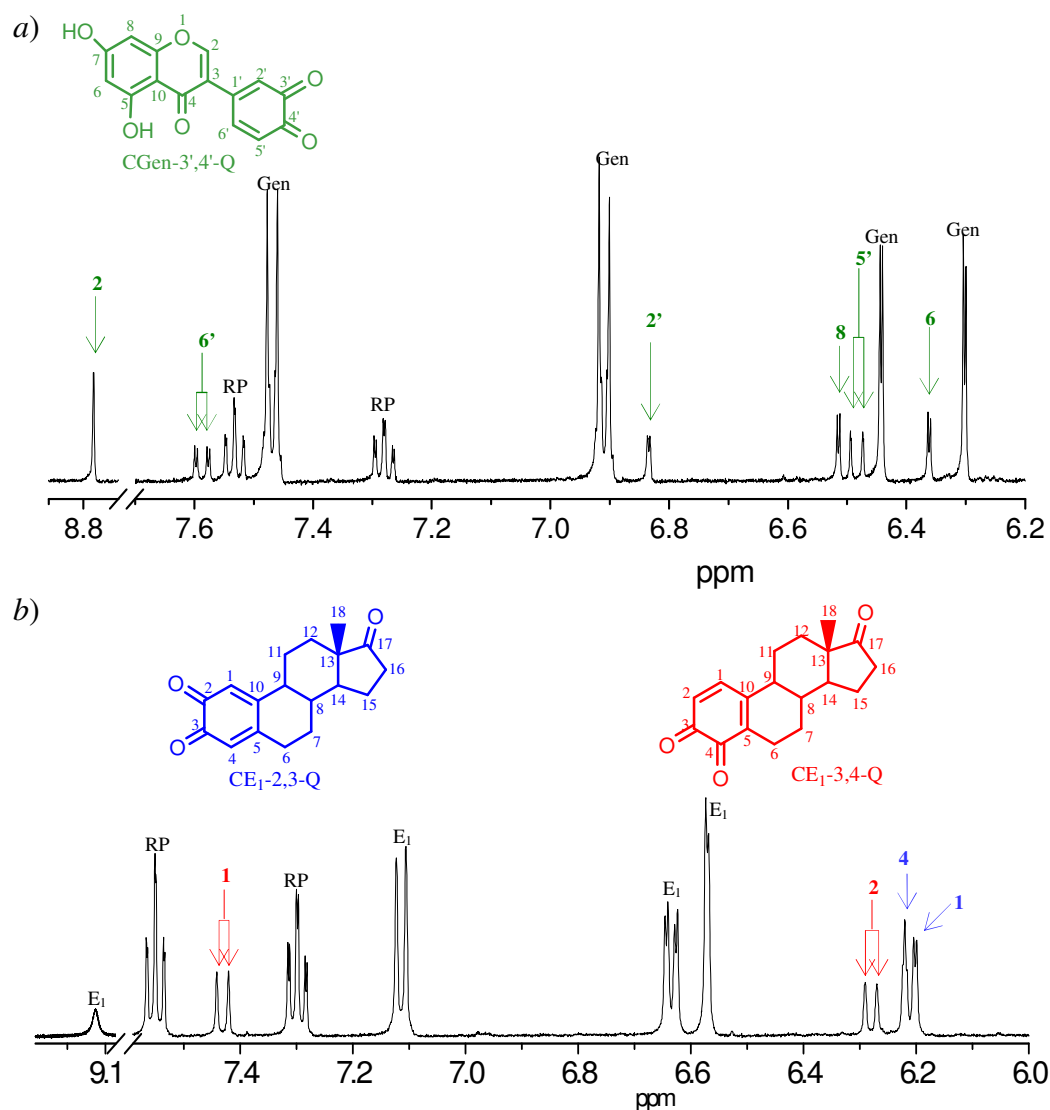

**Figure S1.**  $^1\text{H}$  NMR spectra of a) Gen + IBX with characteristic  $^1\text{H}$  of CGen-3',4'-Q product labeled in green and b)  $\text{E}_1$  + IBX with characteristic  $^1\text{H}$  of  $\text{CE}_1$ -2,3-Q and  $\text{CE}_1$ -3,4-Q products labeled in red and blue, respectively. Peaks of the reactants Gen or  $\text{E}_1$  and the reduced product from IBX (RP) in the reaction mixtures were labeled in black. The y axis is intensity.

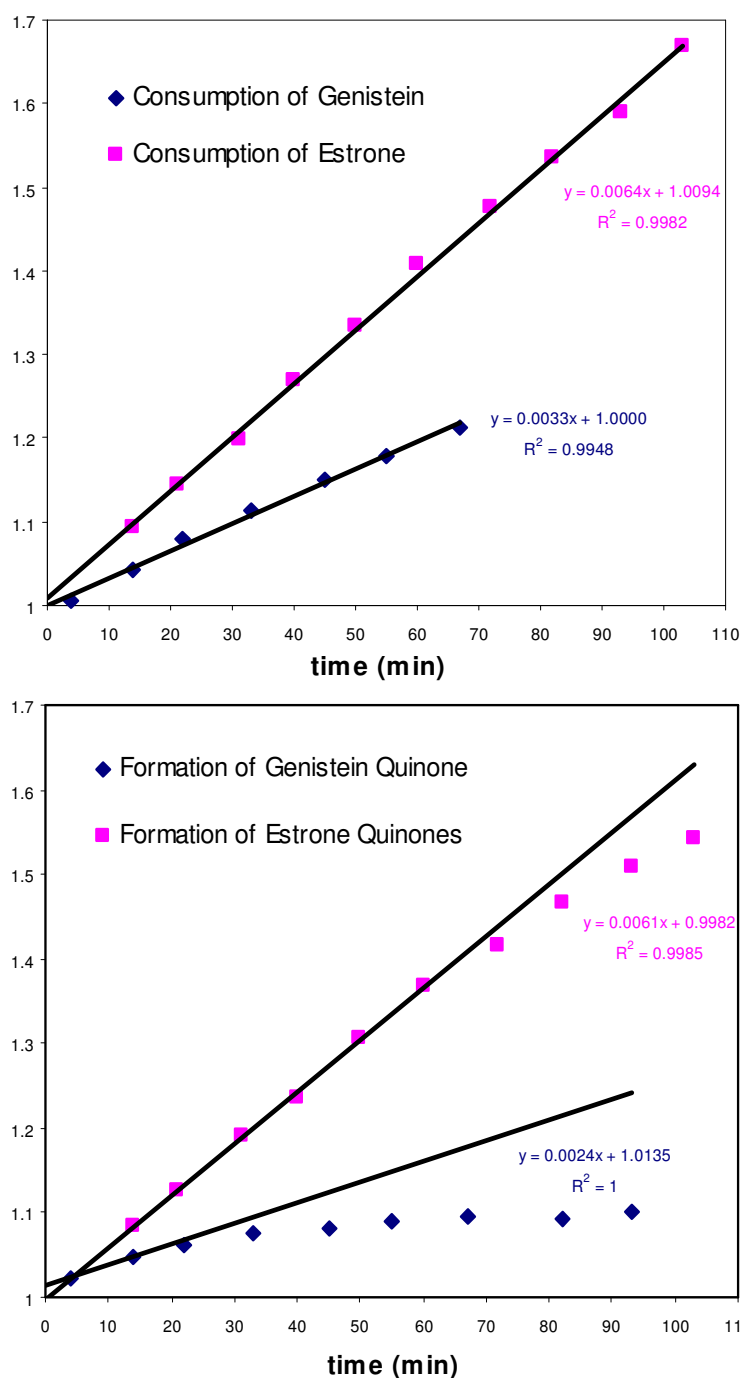

**Figure S2.** 2<sup>nd</sup>-Order kinetics of Gen + IBX and E<sub>1</sub> + IBX monitored with NMR. A) Plot of the consumption of Gen and E<sub>1</sub>, where  $y = \frac{1}{[S]/[S]_0}$  and  $[S] \equiv$  concentration of E<sub>1</sub> or Gen at time t and  $[S]_0 \equiv$  initial concentration of E<sub>1</sub> or Gen. B) Plot of the formation of CGen-3',4'-Q and CE<sub>1</sub>-2,3-Q + CE<sub>1</sub>-3,4-Q, where  $y = \frac{1}{1-[Q]/[S]_0}$  and  $[Q] \equiv$  concentration of the quinone at time t and  $[S]_0 \equiv$  initial concentration of E<sub>1</sub> or Gen. Red squares represent data for E<sub>1</sub> and blue diamond for Gen. For the formation of E<sub>1</sub>, the first six data points were used to calculate rate constant. The formation of CGen-3',4'-Q deviates from 2<sup>nd</sup>-order kinetics at ~ 30 min and only the first two data points were used to estimate the rate constant.

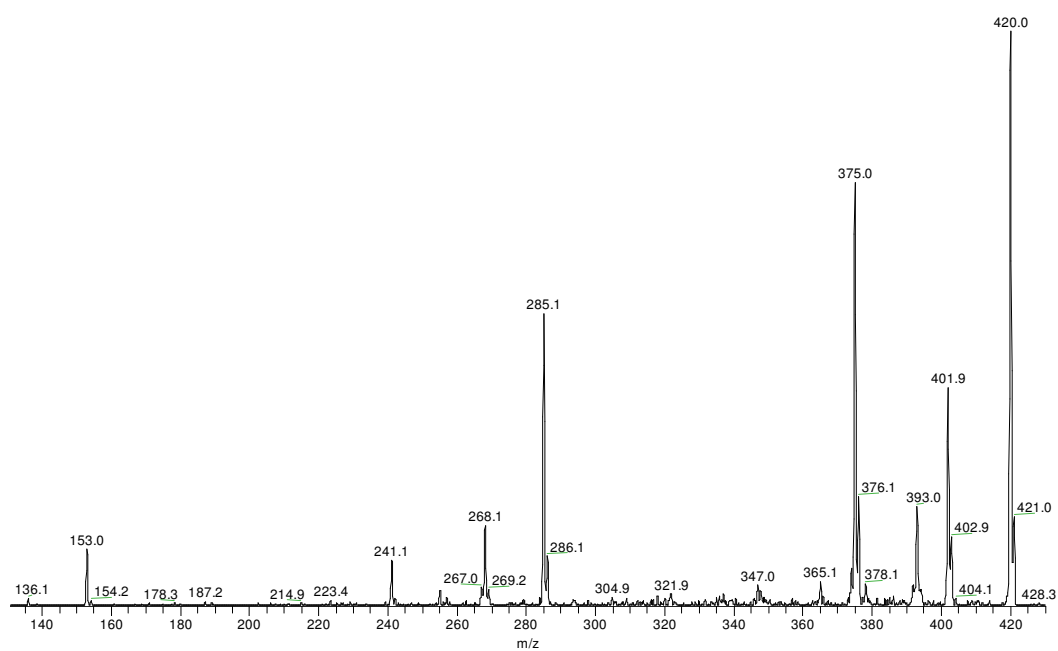

**Figure S3.** An example of MS/MS product-ion spectrum (y axis is relative abundance) of the CGen-Ade adducts in Figure 4 ( $t_R = 16.82$  min).

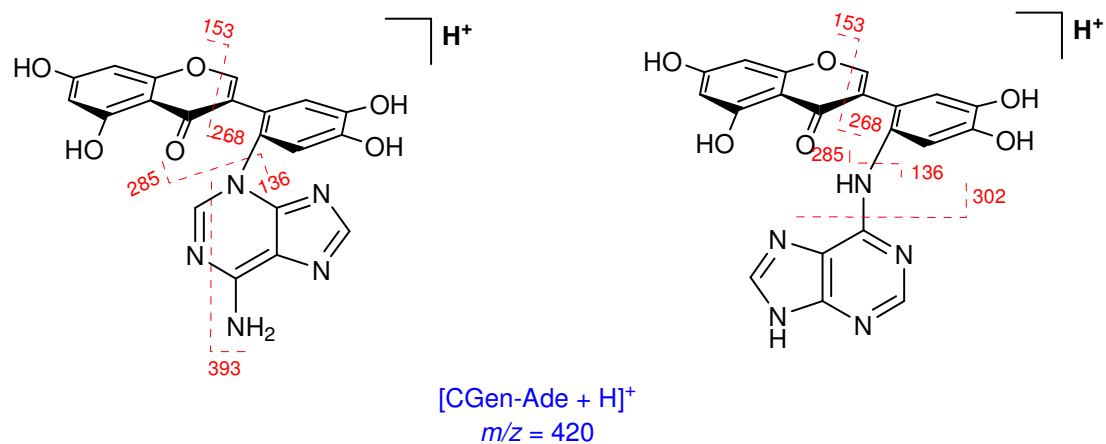

**Figure S4.** Representative structures of [CGen-Ade + H]<sup>+</sup> adducts. Cleavages shown are in accord with MS/MS observations. One characteristic cleavage of [CGen-Ade + H]<sup>+</sup> is C-ring cleavage that produces fragment ions of *m/z* 153 and complementary ion of *m/z* 268.

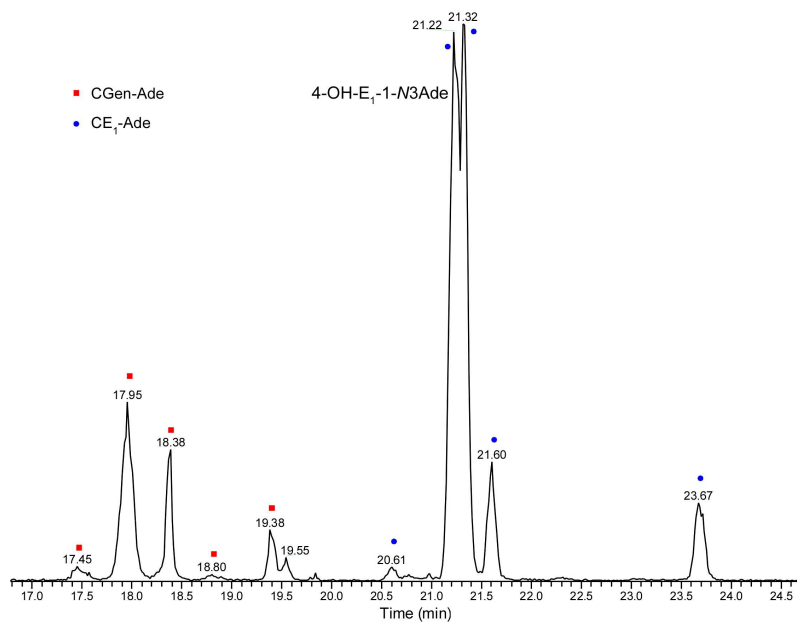

**Figure S5.** Reconstructed base-peak ion chromatogram (y axis is ion intensity) shows the formation of CGen-Ade and CE<sub>1</sub>Q-Ade adducts in DMF. The CGenQ + Ade and CE<sub>1</sub>Q + Ade were mixed at 1:1 ratio.

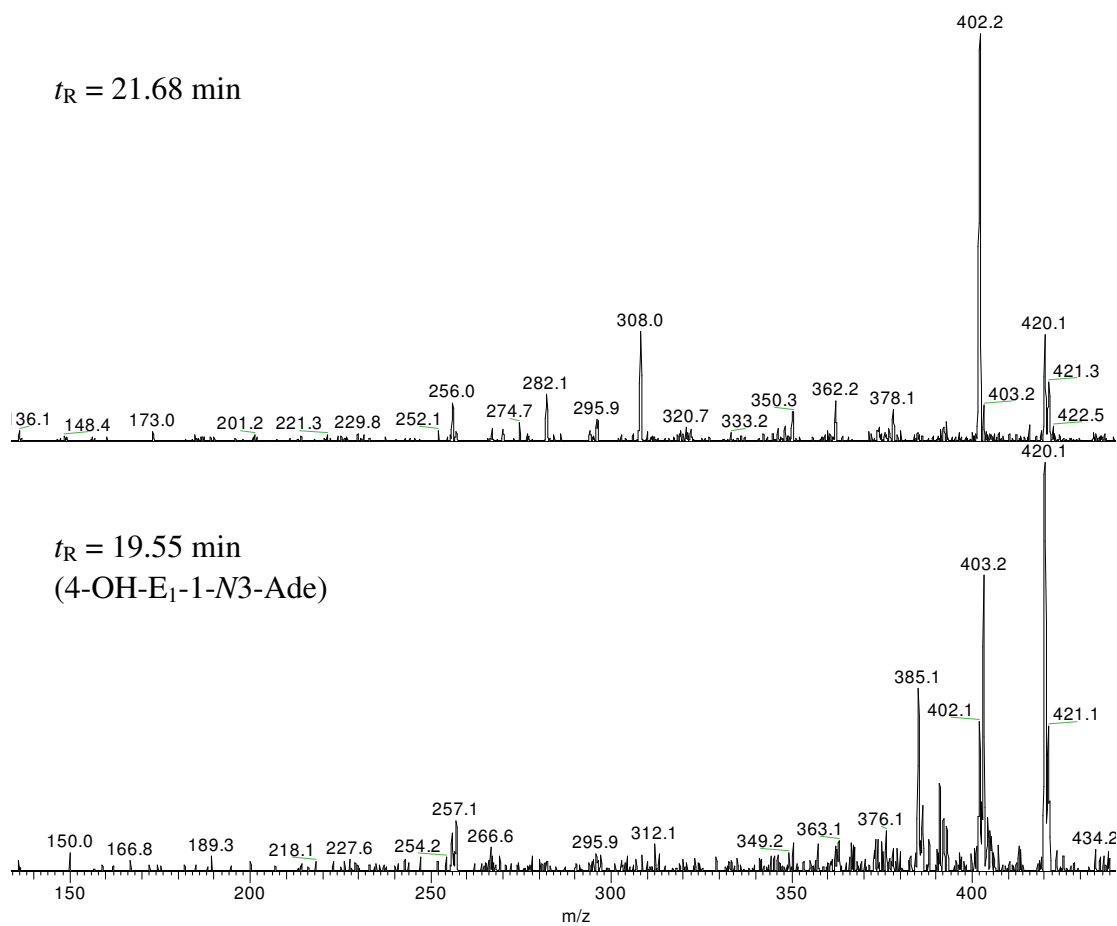

**Figure S6.** MS/MS Product-ion spectra of the two major CE<sub>1</sub>-Ade adducts (4-OH-E<sub>1</sub>-1-N<sup>3</sup>Ade and unknown) identified in the reaction mixture of CE<sub>1</sub>Q + calf thymus DNA at pH 7.4, 37 °C. The y axis is relative abundance.

**Table S1.** Accurate mass measurement of MS/MS product ions of genistein  $[\text{C}_{15}\text{H}_{10}\text{O}_5 + \text{H}]^+$  and catechol genistein  $[\text{C}_{15}\text{H}_{10}\text{O}_6 + \text{H}]^+$

| Parent             | Product                                                    | Measured Mass   | Theoretical Mass | Deviation (mau) |
|--------------------|------------------------------------------------------------|-----------------|------------------|-----------------|
| Genistein          | <b><math>\text{C}_{15}\text{H}_{11}\text{O}_5^+</math></b> | <b>271.0601</b> | <b>271.0601</b>  | <b>0</b>        |
|                    | $\text{C}_{15}\text{H}_9\text{O}_4^+$                      | 253.0495        | 253.0495         | 0               |
|                    | $\text{C}_{14}\text{H}_{11}\text{O}_4^+$                   | 243.0652        | 243.0652         | 0               |
|                    | $\text{C}_{14}\text{H}_{11}\text{O}_3^+$                   | 227.0703        | 227.0703         | 0               |
|                    | $\text{C}_{14}\text{H}_9\text{O}_3^+$                      | 225.0546        | 225.0546         | 0               |
|                    | $\text{C}_{13}\text{H}_{11}\text{O}_3^+$                   | 215.0703        | 215.0703         | 0               |
|                    | $\text{C}_{13}\text{H}_9\text{O}_2^+$                      | 197.0597        | 197.0597         | 0               |
|                    | $\text{C}_{11}\text{H}_7\text{O}_3^+$                      | 187.0390        | 187.0390         | 0               |
|                    | $\text{C}_{10}\text{H}_7\text{O}_2^+$                      | 159.0441        | 159.0441         | 0               |
|                    | $\text{C}_7\text{H}_5\text{O}_4^+$                         | 153.0183        | 153.0183         | 0               |
|                    | $\text{C}_8\text{H}_5\text{O}_3^+$                         | 149.0233        | 149.0233         | 0               |
| Catechol Genistein | <b><math>\text{C}_{15}\text{H}_{11}\text{O}_6^+</math></b> | <b>287.0551</b> | <b>287.0550</b>  | <b>+0.1</b>     |
|                    | $\text{C}_{15}\text{H}_9\text{O}_5^+$                      | 269.0445        | 269.0444         | +0.1            |
|                    | $\text{C}_{14}\text{H}_{11}\text{O}_5^+$                   | 259.0602        | 259.0601         | +0.1            |
|                    | $\text{C}_{13}\text{H}_7\text{O}_6^+$                      | 259.0238        | 259.0237         | +0.1            |
|                    | $\text{C}_{14}\text{H}_9\text{O}_4^+$                      | 241.0496        | 241.0495         | +0.1            |
|                    | $\text{C}_{13}\text{H}_5\text{O}_5^+$                      | 241.0137        | 241.0131         | +0.6            |
|                    | $\text{C}_{13}\text{H}_{11}\text{O}_4^+$                   | 231.0653        | 231.0652         | +0.1            |
|                    | $\text{C}_{12}\text{H}_7\text{O}_5^+$                      | 231.0289        | 231.0288         | +0.1            |
|                    | $\text{C}_{13}\text{H}_9\text{O}_3^+$                      | 213.0546        | 213.0546         | 0               |
|                    | $\text{C}_{11}\text{H}_7\text{O}_4^+$                      | 203.0339        | 203.0339         | 0               |
|                    | $\text{C}_7\text{H}_5\text{O}_4^+$                         | 153.0183        | 153.0183         | 0               |



**Table S2.** Accurate mass measurement for the five catechol genistein adenine  $[\text{C}_{20}\text{H}_{13}\text{N}_5\text{O}_6 + \text{H}]^+$  adducts shown in Figure S5.

| Retention time (min) | Measured Mass | Deviation (mau) |
|----------------------|---------------|-----------------|
| 17.45                | 420.0939      | 0.0             |
| 17.95                | 420.0938      | -0.1            |
| 18.38                | 420.0941      | +0.2            |
| 18.80                | 420.0937      | -0.2            |
| 19.38                | 420.0938      | -0.1            |
